# Supplementary material for: A mark of disease: how mRNA modifications shape genetic and acquired pathologies
Source: RNA. 2021 Apr;27(4):367–89. doi: 10.1261/rna.077271.120 (PMC7962492; doi:10.1261/rna.077271.120)
Supplement: Supplemental Material [file supp_077271.120_Supplemental_Table_S1.xlsx]

## Sheet: Description
Supplemental Table S1. Each sheet of this catalogue contains the list of the characterized RNA marks alterations (m6A (sheet 1 and 2), m1A (sheet 3), m5C (sheet 4), Ψ (sheet 5), A-to-I/C-to-U (sheet 7) and 2'O-Me (sheet 6)) associated to diseases.
Sheet description:
A-to-I/C-to-U	A-to-I/C-to-U alterations associated to diseases
m6A cancer	m6A alterations associated to cancers
m6A non-cancer disease	m6A alterations associated to non-cancer disorders
Ψ	Ψ alterations associated to diseases
m6Am	m6Am alterations associated to diseases
m1A	m1A alterations associated to diseases
m5C	m5C alterations associated to diseases
2'-O-Me	2'-O-Me alterations associated to diseases
Column description:
Short nomenclature	Short nomenclature of RNA mark
Full name	Full name of RNA mark
Disease	Disease associated to the RNA mark's altered levels
Effects	Brief description of the association between RNA mark and disease
Enzyme	Altered RNA marks modifying enzyme
Role of the enzyme	Role of the enzyme in cancer (oncogene/tumor-supressor)
Hallmark of cancer	Hallmarks of cancer characterized in the study
RNA subtype	Target RNA subtype
Modified Transcript	Name of the target gene
Mapping technology	RNA mark mapping technology
Quantification techniques	RNA mark qantification technique
Title	Title of the paper
PMID	PMID of the paper
Direct modification association	Direct association of the modification with the disease (yes/no)

## Sheet: RNA editing
Short nomenclature	Full nomenclature	Disease	Effects	Enzyme	Role of the enzyme	Hallmark of cancer	RNA subtype	Modified Transcript	mapping technology	quantification techniques	Title	PMID	Direct modification association
A-to-I	Adenosine-to-inosine	Aicardi-Goutières syndrome	ADAR1 acts as a suppressor of type I interferon signaling	ADAR1	X	X	mRNA	unknown	Sanger and exome sequencing	RT-PCR	Mutations in ADAR1 cause Aicardi-Goutières syndrome associated with a type I interferon signature	23001123	Yes
A-to-I	Adenosine-to-inosine	rheumatoid arthritis	A-to-I RNA editing increases the expression of Cathepsin S mRNA which is a pro-inflammatory gene	ADAR1	X	inflammation	mRNA	CATHEPSIN S	Sanger and RNA-seq	RT-qPCR	Increased adenosine-to-inosine RNA editing in rheumatoid arthritis	31493964	Yes
A-to-I	Adenosine-to-inosine	Breast cancer	ADAR1 expression is higher in tumor compared to patient-matched normal breast tissues and cell proliferation is correlated to its activity	ADAR1	oncogene	cell proliferation, migration	mRNA	unknown	exome sequencing, RNA-seq	immunoblotting, qRT-PCR	Principles governing A-to-I RNA editing in the breast cancer transcriptome	26440892	Yes
A-to-I	Adenosine-to-inosine	Behavioral and neurological consequences	Editing events of human KV1.1 mRNA affects human potassium channel inactivation	ADAR2	X	X	mRNA	KV1.1	sequencing of RT-PCR product	RT-PCR	Control of human potassium channel inactivation by editing of a small mRNA hairpin	15361858	Yes
A-to-I	Adenosine-to-inosine	Cardiac Disease	RNA ‐editing of Filamin A pre‐mRNA is decreased in human cardiac disease	ADAR2	X	X	mRNA	FLNA	sequencing of RT-PCR product	RT-PCR	RNA editing of Filamin A pre-mRNA regulates vascular contraction and diastolic blood pressure	30087110	Yes
A-to-I	Adenosine-to-inosine	Cervical cancer	The two edited forms of BLCAP fail to inhibit STAT3 phosphorylation indicating that A-to-I RNA editing drive anti-tumorigenic BLCAP to a loss-of-function one which might facilitate the cervical cancer initiating and progressing events	ADAR1	tumor-suppressor/oncogene	cell proliferation, migration	mRNA	BLCAP	Miseq-sequencing, pyrosequencing	RT-PCR, Co-IP	RNA editing of BLCAP lost the inhibition to STAT3 activation in cervical cancer	28455960	Yes
A-to-I	Adenosine-to-inosine	Colorectal cancer	Edited form of RhoQ protein plays an important role in promoting the invasive potential of CRC	ADAR	oncogene	cell proliferation, invasion	mRNA	RHOQ	RNA-seq, pyrosequencing	ICE assay, in vitro invasion assay, cell proliferation assay	RNA editing in RHOQ promotes invasion potential in colorectal cancer	24663214	Yes
A-to-I	Adenosine-to-inosine	Acute Myeloid Leukemia	Splicing mutations affecting either the SH2 or PTPase domain of SHP-1 in motheaten and viable motheaten mice lead to multiple hematopoietic abnormalities, including the overexpansion and accumulation of myelomonocytic populations	ADARs	tumor-suppressor	cell proliferation, tumorigenicity	non-coding sequence	PTPN6 in low differenziated CD117 and CD34	exome sequencing	semi-quantitative RT-PCR	RNA hyperediting and alternative splicing of hematopoietic cell phosphatase (PTPN6) gene in acute myeloid leukemia	11001933	Yes
A-to-I	Adenosine-to-inosine	Chronic Myeloid Leukemia	Increased IFN-γ pathway gene expression	ADAR1	oncogene	cell self-renewal	mRNA	unknown	RNA-seq	qRT-PCR	ADAR1 promotes malignant progenitor reprogramming in chronic myeloid leukemia	23275297	Yes
A-to-I	Adenosine-to-inosine	Depression disorder	RNA editing inhibits the enzymatic activity of TPH2 splice variants	ADARs	X	X	mRNA	TPH2a	exone sequencing	HPLC	Alternative splicing and extensive RNA editing of human TPH2 transcripts	20126463	Yes
A-to-I	Adenosine-to-inosine	Depression disorder	RNA editing inhibits the enzymatic activity of TPH2 splice variants	ADARs	X	X	mRNA	TPH2b	exone sequencing	HPLC	Alternative splicing and extensive RNA editing of human TPH2 transcripts	20126463	Yes
C-to-U	Cytidine-to-uridine	Diabetes/obesity	APOBEC1 RNA editing is corrlated to a reduction of atherosclerosis thanks to the presence of ApoB48 isoform	APOBEC1	X	X	mRNA	ApoB48	direct sequencing	Prime extension assay	RNA Editing of Apolipoprotein B mRNA Vol. 265, No. 12. Issue of April 25, pp. 6811-6816, 1990 Printed in U.S. A. SEQUENCE SPECIFICITY DETERMINED BY IN VITRO COUPLED TRANSCRIPTION EDITING*	2324099	Yes
A-to-I	Adenosine-to-inosine	Type 2 Diabetes	RNA editing on ARPIN promotes the disease risk and is closely associated to type 2 Diabets	ADAR	X	X	mRNA (3'UTR)	ARPIN	RNA-seq	Computational methods	Global analysis of A-to-I RNA editing reveals association with common disease variants	29527417	Yes
A-to-I	Adenosine-to-inosine	Esophageal squamous cell carcinoma	ADAR2 suppresses tumor growth and induces apoptosis by editing and stabilizing IGFBP7 in ESCC	ADAR2	tumor-suppressor	tumorigenicity	mRNA	IGFBP7	RNA-seq	RT-PCR	ADAR2 functions as a tumor suppressor via editing IGFBP7 in esophageal squamous cell carcinoma	28035363	Yes
A-to-I	Adenosine-to-inosine	Esophageal squamous cell carcinoma	A-to-I RNA editing of the SLC22A3 gene is associated with the reduced SLC22A3 transcription and lymph node metastasis	ADAR2	oncogene	tumor progression	mRNA	SLC22A3	Pyrosequencing,Sanger sequencing	RT-PCR	RNA editing of SLC22A3 drives early tumor invasion and metastasis in familial esophageal cancer	28533408	Yes
A-to-I	Adenosine-to-inosine	Esophageal squamous cell carcinoma	The editing of FLNB is responsible for the ADAR1-induced malignant phenotypes during ESCC progression	ADAR1	oncogene	tumor progression	mRNA	FLNB	direct sequencing on PCR products	RT-PCR	Adenosine-to-inosine RNA editing mediated by ADARs in esophageal squamous cell carcinoma	24302582	Yes
A-to-I	Adenosine-to-inosine	Glioblastoma	The over-editing at the COG3 I/V site plays a critical pro-tumoral role in GBM and correlates with a worse prognosis in GBM patients	ADAR2	unknown	unknown	mRNA	COG3	Direct sequencing	qRT-PCR	Dynamic inosinome profiles reveal novel patient stratification and gender-specific differences in glioblastoma	30760294	Yes
A-to-I	Adenosine-to-inosine	Glioblastoma	Anti-tumoral: reduction of maturation of oncogenic precursors	ADAR2	oncogene	cell proliferation, migration	miRNA	miR-222/221 and miR-21 precursors	direct cDNA seq/single-clone seq/Miseq (illumina)	mathematical analyses	Modulation of microRNA editing, expression and processing by ADAR2 deaminase in glioblastoma	25582055	Yes
A-to-I	Adenosine-to-inosine	Glioblastoma, Alzheimer's Disease	Deficiency of RNA editing in Q/R site of the GluA2 induces the loss of Ca2+ homeostasis associated with early onset epilepsy and premature death	ADAR2	unknown	tumorigenicity, cell growth, proliferation	mRNA	GRIA2	Direct sequencing	RT-PCR	Underediting of glutamate receptor GluR-B mRNA in malignant gliomas	11717408	Yes
A-to-I	Adenosine-to-inosine	Hepatocellular carcinoma	Two over-editing sites (Q103R and K96R) of CDK13, modified by ADAR1, are more abundant in HCC tumor tissues and are associated with poor prognosis of HCC patients	ADAR1	oncogene	tumor development and progression	mRNA	CDK13	Illumina HiSeq 3000 sequencing	RNAEditor	CDK13 RNA Over-Editing Mediated by ADAR1 Associates with Poor Prognosis of Hepatocellular Carcinoma Patient	29996118	Yes
A-to-I	Adenosine-to-inosine	Hepatocellular carcinoma	Hypo-editing of COPA is closely associated with HCC pathogenesis and ADAR2 downregulation increased risk of liver cirrhosis and postoperative recurrence and had poor prognoses	ADAR2	tumor-suppressor	tumor pathogenesis	mRNA	COPA	direct sequencing on PCR product	DSGene quantification	A disrupted RNA editing balance mediated by ADARs (Adenosine DeAminases that act on RNA) in human hepatocellular carcinoma	23766440	Yes
A-to-I	Adenosine-to-inosine	Hepatocellular carcinoma	RNA editing increases and neutralizes a key inhibitor of the polyamine synthesis pathway, thereby promoting proliferation in vitro and increasing tumor initiation and is asscoaited with liver cirrhosis	ADAR1	oncogene	cell proliferation, invasion, tumorigenicity	mRNA	AZIN1	RNA-seq	qRT-PCR	Recoding RNA editing of AZIN1 predisposes to hepatocellular carcinoma	23291631	Yes
C-to-U	Cytidine-to-uridine	Hepatocellular carcinoma	Overespression of APOBEC1 determines aberrant editing that could contribute to the oncogenesis	APOBEC1	oncogene	tumorigenicity	mRNA	NAT1	RNA sequencing	RT-PCR	A novel translational repressor mRNA is edited extensively in livers containing tumors caused by the transgene expression of the apoB mRNA-editing enzyme	9030685	Yes
A-to-I	Adenosine-to-inosine	Hepatocellular carcinoma	Hyper-editing of FLNB is closely associated with HCC pathogenesis and ADAR1 overexpression increased risk of liver cirrhosis and postoperative recurrence and had poor prognoses	ADAR1	oncogene	tumor progression	mRNA	FLNB	direct sequemcing on PCR products	RT-PCR	A disrupted RNA editing balance mediated by ADARs (Adenosine DeAminases that act on RNA) in human hepatocellular carcinoma	23766440	Yes
A-to-I	Adenosine-to-inosine	Lung cancer	ADAR1 has an ocogenic potential and the overexpression of the edited NEIL1 can enhance the growth and the invasion in the lung carcinoma	ADAR1	oncogene	tumor growth	mRNA	NEIL1	whole-transcriptome sequencing	RT-PCR	Gene amplification-associated overexpression of the RNA editing enzyme ADAR1 enhances human lung tumorigenesis	26640150	Yes
A-to-I	Adenosine-to-inosine	Myeloma	Alu-dependent RNA editing of GLI1 promotes malignant regeneration in myeloma	ADAR2	oncogene	cell growth	mRNA	GLI1	Sanger sequencing	qPCR	Alu-dependent RNA editing of GLI1 promotes malignant regeneration in multiple myeloma.	29203771	Yes
C-to-U	Cytidine-to-uridine	Neurofibromatosis	C→U editing of NF1 RNA creates a translational stop codon, potentially leading to premature truncation of neurofibromin	APOBEC1	tumor-suppressor	tumorigenicity	mRNA	NF1	Direct sequencing	RT-PCR	C→U Editing of Neurofibromatosis 1 mRNA Occurs in Tumors That Express Both the Type II Transcript and apobec-1, the Catalytic Subunit of the Apolipoprotein B mRNA–Editing Enzyme	11727199	Yes
A-to-I	Adenosine-to-inosine	Parkinson disease	RNA editing repairs the PINK1 W437amber mutation rescue the PINK1/Parkin-mediated mitophagy	ADAR2	X	X	mRNA	PINK1	Sanger sequencing	Fluorescence microscopy/RNA seq	Harnessing human ADAR2 for RNA repair – Recoding a PINK1 mutation rescues mitophagy	27907896	Yes
C-to-U	Cytidine-to-uridine	Several deseases, including Wilms tumor and acute myeloid leukemia	RNA editing of A3A induces changes in WT1 mRNA which correspond to driver cancer mutations suggests a potential role for this novel modification in cancer mutagenesis	APOBEC3A	tumor-suppressor/oncogene	unknown	mRNA	WT1	Sanger sequencing	qRT-PCR	APOBEC3A Is Implicated in a Novel Class of G-to-A mRNA Editing in WT1 Transcript	25807502	Yes
A-to-I	Adenosine-to-inosine	Severe epilepsy	RNA editing in GluR-B is essential for brain development to avoid the alteration of calcium permeability which affects mice seizure and survival	ADAR2	X	X	mRNA	GRIA2	X	RT-PCR	Early-onset epilepsy and postnatal lethality associated with an editing-deficient GluR-B allele in mice	7502080	Yes
A-to-I	Adenosine-to-inosine	Amiothrophic Lateral Sclerosis	Defect in the editing of the messenger RNA encoding the GluR2 subunit of glutamate AMPA receptors in the spinal motor neurons of individuals affected by ALS	ADAR2	X	X	mRNA	GRIA2	X	X	Aberrant RNA homeostasis in amyotrophic lateral sclerosis: potential for new therapeutic targets?	25531686	Yes
C-to-U	Cytidine-to-uridine	Temporal Lobe Epilepsy	Increased C-to-U RNA editing mediated by APOBEC1 leads to neuronal gain-of-function through presynaptic activity of RNA-edited GlyRs, resulting in facilitation of neurotransmitter release	APOBEC1	X	disease progression	mRNA	GLYR	X	RT-PCR	A Novel RNA Editing Sensor Tool and a Specific Agonist Determine Neuronal Protein Expression of RNA-Edited Glycine Receptors and Identify a Genomic APOBEC1 Dimorphism as a New Genetic Risk Factor of Epilepsy	29375302	Yes
A-to-I	Adenosine-to-inosine	Psychiatric disorders	5HT2C editing is altered in individuals suffering from psychiatric disorders	ADAR	X	regulation of anxiety, components of the stress response	mRNA	5HT2C	direct sequencing or pyrosequencing analysis	RT-PCR and prime extension analysis	Quantitative analysis of 5HT2C receptor RNA editing patterns in psychiatric disorders	21914481	Yes
A-to-I	Adenosine-to-inosine	Systemic Lupus Erythematosus	A-to-I Hypo-editing causes the upregulation of PDE8A1 transcript in SLE T cells	ADAR2	X	X	mRNA	PDE8A1	X	competitive PCR	Altered editing in cyclic nucleotide phosphodiesterase 8A1 gene transcripts of systemic lupus erythematosus T lymphocytes	18462347	Yes
A-to-I	Adenosine-to-inosine	Glioblastoma Multiforme	The overexpression of ADARB1 inhibits GBM proliferation	ADARB1	tumor-suppressor	low cancer development	mRNA	MED13	direct sequencing	RT-qPCR	Altered adenosine-to-inosine RNA editing in human cancer	17908822	Yes
A-to-I	Adenosine-to-inosine	Glioblastoma Multiforme	The reduction of ADARB2 is correlated with the grade of malignancy of glioblastoma multiforme	ADARB2	tumor-suppressor	high grade of malignancy	mRNA	MED13	direct sequencing	RT-qPCR	Altered adenosine-to-inosine RNA editing in human cancer	17908822	Yes
A-to-I	Adenosine-to-inosine	Alzheimer's disease	Alzheimer disease is correlated with a reduction of A to I RNA editing	ADAR1	X	X	mRNA	membrane receptors and ion channels	RNA-seq	RT-PCR	Reduced levels of protein recoding by A-to-I RNA editing in Alzheimer's disease	26655226	Yes
A-to-I	Adenosine-to-inosine	Amiothrophic Lateral Sclerosis	The inefficient GluA2 Q/R site-editing by ADAR2 is one cause of motor neuron death in ALS.	ADAR2	X	X	mRNA	GRIA2	X	RT-PCR	Profound downregulation of the RNA editing enzyme ADAR2 in ALS spinal motor neurons	22226999	Yes
A-to-I	Adenosine-to-Inosine	Dyschromatosis Symmetrica Hereditaria	Mutations of of the DSRAD gene are found in patients with DSH	ADAR1	X	X	mRNA	DSRAD	X	X	Mutations of the RNA-Specific Adenosine Deaminase Gene (DSRAD) Are Involved in Dyschromatosis Symmetrica Hereditaria	12916015	Yes
A-to-I	Adenosine-to-Inosine	Temporal Lobe Epilepsy	The degree of R/G editing is significantly increased in the hippocampal tissue and n neo-cortical tissue in patients	ADAR1 and ADAR2	X	X	mRNA	GRIA2	X	RT-PCR	RNA editing (R/G site) and flip–flop splicing of the AMPA receptorsubunit GluR2 in nervous tissue of epilepsy patients	15006707	Yes

## Sheet: m6A cancer
Short nomenclature	Full name	Disease	Effects	Enzyme	Role of the enzyme	Hallmark of cancer	RNA subtype	Modified Transcript	m6A mapping technology	m6A quantification techniques	Title	PMID	Direct modification association
m6A	N6-methyladenosine	Glioblastoma	Increased m6A methylation protects against GSCs self-renewal, proliferation and tumorigenesis. The increased ALKBH5 expression in GSCs is associated to a decreased methylation of FOXM1 pre-mRNA.	ALKBH5	oncogene	cell self-renewal, proliferation, tumorigenicity, cell cycle regulation	mRNA	FOXM1	MeRIP-seq	MeRIP-qPCR, m6A quantification	The m6A Demethylase ALKBH5 Maintains Tumorigenicity of Glioblastoma Stem-Like Cells by Sustaining FOXM1 Expression and Cell Proliferation Program ; FoxM1 Drives a Feed-forward STAT3-activation Signaling Loop that Promotes the Self-renewal and Tumorigenicity of Glioblastoma Stem-like Cells	28344040;25832656	Yes
m6A	N6-methyladenosine	Glioblastoma	Decreased methylation promotes GSCs growth and self-renewal. METTL3 induced methylation protects against GSCs growth and self-renewal	METTL3	tumor-suppressor	cell self-renewal, proliferation, tumorigenicity	mRNA	ADAM19	MeRIP-seq	m6A dot blot assay	m6A RNA Methylation Regulates the Self-Renewal and Tumorigenesis of Glioblastoma Stem Cells	28297667	Yes
m6A	N6-methyladenosine	Glioblastoma	Decreased methylation promotes GSCs growth and self-renewal. METTL14 induced methylation protects against GSCs growth and self-renewal	METTL14	tumor-suppressor	cell self-renewal, proliferation, tumorigenicity	mRNA	ADAM19	MeRIP-seq	m6A dot blot assay	m6A RNA Methylation Regulates the Self-Renewal and Tumorigenesis of Glioblastoma Stem Cells"	28297667	Yes
m6A	N6-methyladenosine	Glioblastoma	m6A methylation protects against GSCs growth and self-renewal. FTO induced demethylation regulates GSCs growth and self-renewal, promotes tumor progression and shortens the lifespan of GSC-grafted animals.	FTO	oncogene	cell self-renewal, proliferation, tumorigenicity	mRNA	ADAM19	MeRIP-seq	m6A dot blot assay	m6A RNA Methylation Regulates the Self-Renewal and Tumorigenesis of Glioblastoma Stem Cells"	28297667	Yes
m6A	N6-methyladenosine	Glioblastoma	Increased m6A methylation (mediated by METTL3) induces GSCs mantainance and radioresistence, regulation of alternative splicing events and stability, differential regulation of miRNA and lincRNA, and expression of direct and indirect targets in key glioblastoma-related oncogenic pathways ( NOTCH, NFkB, Wnt, c-Myc, and TGF-b)	METTL3	oncogene	cell mantainance and radioresistence	mRNA	NOTCH, NFkB, Wnt, c-Myc, and TGF-b	MeRIP-seq	X	N6-Methyladenosine Landscape of Glioma Stem-Like Cells: METTL3 Is Essential for the Expression of Actively Transcribed Genes and Sustenance of the Oncogenic Signaling; Essential role of METTL3-mediated m6A modification in glioma stem-like cells maintenance and radioresistance	30781903;28991227	Yes
m6A	N6-methyladenosine	Glioblastoma	WTAP overexpression increases proliferation, migration, invasion and tumorigenicity of glioblastoma cells	WTAP	oncogene	cell proliferation, migration, invasion and tumorigenicity	mRNA	CCL2, CCL3, HAS1, LOXL1, MMP3, THBS1	X	X	Expression and roles of Wilms' tumor 1‐associating protein in glioblastoma; WTAP Expression Predicts Poor Prognosis in Malignant Glioma Patients	22957919;27370540	No
m6A	N6-methyladenosine	Renal cell carcinoma	m6A methylation (induced by METTL3) protects against RCCs proliferation, migration and invasion functions , and EMT and PI3K-Akt-mTOR pathways may be involved in the potential mechanisms.	METTL3	tumor-suppressor	cell cycle regulation, cell proliferation, tissue invasion, and metastasis	mRNA	EMT; PI3K-Akt-mTOR	X	X	The M6A methyltransferase METTL3: acting as a tumor suppressor in renal cell carcinoma	29221190	No
m6A	N6-methyladenosine	Renal cell carcinoma	Increased P2RX6 mRNA m6A methylation level (induced by METTL14) enhances P2RX6 pre-mRNA splicing, decreases ATP-P2RX6-Ca2+ −p-ERK1/2-MMP9 axis and protects against RCCs migration and invasion.	METTL14	tumor-suppressor	cell migration and invasion	mRNA	P2RX6	X	m6A quantification	The m6A-suppressed P2RX6 activation promotes renal cancer cells migration and invasion through ATP-induced Ca2+ influx modulating ERK1/2 phosphorylation and MMP9 signaling pathway	31159832	Yes
m6A	N6-methyladenosine	Renal cell carcinoma	Demethylation of adenosine residues in the 3′‐UTR of PGC‐1α mRNA (induced by FTO), leads to increased PGC‐1α mRNA stability and protein expression, and increased mitochondrial biogenesis, oxidative stress and tumour suppression	FTO	tumor-suppressor	mitochondrial biogenesis, oxidative stress and tumour suppression	mRNA	PGC‐1α	X	MeRIP-qPCR	N6‐methyladenosine demethylase FTO suppresses clear cell renal cell carcinoma through a novel FTO‐PGC‐1α signalling axis	30648791	Yes
m6A	N6-methyladenosine	Renal cell carcinoma	In RCC cell lines and tissues, WTAP is significantly overexpressed. Mechanistic studies exhibited that CDK2 expression is positively associated with the expression of WTAP. Moreover, WTAP stabilizes CDK2 transcript to enhance CDK2 expression via binding to 3′-UTR of CDK2 transcript.	WTAP	oncogene	cell proliferation	mRNA	CDK2	X	X	Wilms’ tumor 1-associating protein promotes renal cell carcinoma proliferation by regulating CDK2 mRNA stability	29482572	No
m6A	N6-methyladenosine	Non-small cell lung cancer	METTL3 promotes the translation of oncogenes such as EGFR and TAZ independently from its catalytic activity and m6A readers. The expression of these oncogenes mediates NSCLC cells growth, survival and invasion. METTL3 upregulation is reached by the downregulaion of miR-33a in NSCLC cells which normally reduces the expression of METTL3 by targeting its 3'UTR region.	METTL3	oncogene	cell growth, survival, invasion	mRNA	EGFR, TAZ	MeRIP-seq	X	METTL3 promotes translation in human cancer cells ; MiR-33a suppresses proliferation of NSCLC cells via targeting METTL3 mRNA	27117702;27856248	Yes
m6A	N6-methyladenosine	Non-small cell lung cancer	Direct physical and functional interaction between METTL3 and the eukaryotic translation initiation factor 3 subunit h (eIF3h). The METTL3–eIF3h interaction is required for enhanced translation (BRD4), formation of densely packed polyribosomes and oncogenic transformation.	METTL3	oncogene	cell invasion, tumor growth	mRNA	BRD4	MeRIP-seq	X	mRNA circularization by METTL3-eIF3h enhances translation and promotes oncogenesis.	30232453	Yes
m6A	N6-methyladenosine	Non-small cell lung cancer	METTL3 is overexpressed in lung cancer tissues and cell lines. The m6A mRNA methylation initiated by METTL3 promotes YAP mRNA translation via recruiting YTHDF1/3 and eIF3b to the translation initiation complex and increases YAP mRNA stability through the regulation of the MALAT1-miR-1914-3p- YAP axis. The increased YAP expression and activity induce NSCLC drug resistance and metastasis.	METTL3	oncogene	cell invasion, metastasis, drug resistance	mRNA, lncRNA	YAP, MALAT1	X	HPLC–tandem mass spectrometry, MeRIP-PCR	m(6) a mRNA methylation initiated by METTL3 directly promotes YAP translation and increases YAP activity by regulating the MALAT1-miR-1914- 3p-YAP axis to induce NSCLC drug resistance and metastasis	31818312	Yes
m6A	N6-methyladenosine	Non-small cell lung cancer	Increased m6A methylation level reduces USP7 mRNA expression and reduces both the proliferation rate of lung cancer cells and the capacity of colony formation. The increased USP7 mRNA stability through FTO mediated demethylation explaines FTO oncogenic role for the growth of NSCLC cells	FTO	oncogene	cell growth, proliferation	mRNA	USP7	X	MeRIP-qPCR	The m6A demethylase FTO promotes the growth of lung cancer cells by regulating the m6A level of USP7 mRNA	30905413	Yes
m6A	N6-methyladenosine	Non-small cell lung cancer	Increased m6A methylation level reduces MZF1 mRNA expression. FTO upregulation mediates MZF1 mRNA demethylation and increased MZF1 mRNA stability. This leads to an enhanced MZF1 expression, which explains the oncogenic roles of FTO in LUSCs	FTO	oncogene	cell proliferation, invasion	mRNA	MZF1	X	m6A quantification	m6A demethylase FTO facilitates tumor progression in lung squamous cell carcinoma by regulating MZF1 expression	29842885	Yes
m6A	N6-methyladenosine	Non-small cell lung cancer	YTHDF2 is upregulated in lung cancer tissues and it recognizes m6A sites on the 3′UTR of 6-phosphogluconate dehydrogenase(6PGD) and facilitates its translation, which advances the pentose phosphate pathway (PPP) flux , which is crucial for tumor growth.	YTHDF2	oncogene	cell growth	mRNA	6PGD	MeRIP-seq	MeRIP RT-PCR	YTH domain family 2 promotes lung cancer cell growth by facilitating 6-phosphogluconate dehydrogenase mRNA translation	31504235	Yes
m6A	N6-methyladenosine	Non-small cell lung cancer	Intermittent hipoxia (HI) promotes the expression of ALKBH5 in lung adenocarcinoma. The m6A demethylase ALKBH5 affects the proliferation and invasion of lung adenocarcinoma cells under IH by downregulating m6A modification on FOXM1 mRNA and by promoting FOXM1 expression. FOXM1 has been reported to play an important role in cell proliferation, cell cycle, cell differentiation, angiogenesis and met…	ALKBH5	oncogene	cell growth, proliferation, migration, invasion	mRNA	FOXM1	X	MeRIP-qPCR	ALKBH5-m6A-FOXM1 signaling axis promotes proliferation andvinvasion of lung adenocarcinoma cells under intermittent hypoxia	31677788	Yes
m6A	N6-methyladenosine	Non-small cell lung cancer	ALKBH5 is upregulated in the NSCLC tissue and cells. ALKBH5 induces the demethylation of TIMP3 transcript to repress its mRNA stability leading to NSCLC tumor progression	ALKBH5	oncogene	cell growth, proliferation, migration, invasion	mRNA	TIMP3	X	MeRIP-qPCR	N6-methyladenosine (m6A) ALKBH5 promotes the non-small cell lung cancer progress by regulating TIMP3 stability	31927006	Yes
m6A	N6-methyladenosine	Malignant pleural mesothelioma	The association between MPM and asbestos exposure is established but the mechanism hasn't been clearly elucidated yet. One suggested mechanism is that asbestos causes DNA damage by inducing DNA alkylation and methylation. So methylation could be at the bases of the MPM onset and the characterized FTO rs9939609 polymorphism which alteres its expression level, may play a role in asbestos-induced me…	FTO	unknown	unknown	mRNA	unknown	X	X	The Association Between the FTO rs9939609 Variant and Malignant Pleural Mesothelioma Risk: A Case–Control Study	29260910	No
m6A	N6-methyladenosine	Pancreatic cancer	m6A methylation is regulating apoptosis and chemo/radioresistance. Methylation of METTL3 target genes induces a decrease in apoptotic responses to GEM and it protects from DNA damage after UVC.	METTL3	oncogene	cell self-renewal	mRNA	MAPK cascades, ubiquitin-dependent process, RNA splicing and regulation of the cellular process	X	X	The epitranscriptome m6A writer METTL3 promotes chemo- and radioresistance in pancreatic cancer cells	29345285	No
m6A	N6-methyladenosine	Pancreatic cancer	YTHDF2 binds to m6A-containing mRNAs and regulates their localization and stability. YTHDF2 upregulation increases the proliferative abilities of pancreatic cells by enhancing Akt/GSK3b/CyclinD1 pathway and on the opposite side it represses the invasion and migration abilities (EMT) by supressing the YAP pathway	YTHDF2	oncogene	cell proliferation	mRNA	p-AKT/GSK3b/CyclinD1	X	X	YTH domain family 2 orchestrates epithelial-mesenchymal transition/proliferation dichotomy in pancreatic cancer cells	29135329	No
m6A	N6-methyladenosine	Pancreatic cancer	YTHDF2 binds to m6A-containing mRNAs and regulates their localization and stability. YTHDF2 upregulation increases the proliferative abilities of pancreatic cells by enhancing Akt/GSK3b/CyclinD1 pathway and on the opposite side it represses the invasion and migration abilities (EMT) by supressing the YAP pathway	YTHDF2	tumor-suppressor	cell invasion, migration, metastasis	mRNA	YAP	X	X	YTH domain family 2 orchestrates epithelial-mesenchymal transition/proliferation dichotomy in pancreatic cancer cells	29135329	No
m6A	N6-methyladenosine	Pancreatic cancer	ALKBH5 decreases WIF-1 mRNA m6A levels and thus increases WIF protein levels. The upregulation of WIF-1 inhibits Wnt pathway and its downstream targets, leading to the inhibition of pancreatic tumorigenesis and sensitization to chemotherapy. Thus, the downregulation of ALKBH5 in pancreatic cancer, induces PDAC cell proliferation, migration, invasion, tumorigenesis, and metastasis in vitro and in …	ALKBH5	tumor-suppressor	cell proliferation, invasion, migration	mRNA	WIF-1	MeRIP-seq	MeRIP-qPCR	m6A demethylase ALKBH5 inhibits pancreatic cancer tumorigenesis by decreasing WIF-1 RNA methylation and mediating Wnt signaling	31906946	Yes
m6A	N6-methyladenosine	Cervical cancer	m6A methylation of β-catenin was found to be related to chemo/radiotherapy resistance of CSCC cells. Increased levels of FTO in those cells induce a decreased methylation level in β-catenin and an increased chemo/radiotherapy resistance trought the ERCC1 axis.	FTO	oncogene	chemo/radiotherapy resistance	mRNA	β-catenin	X	MeRIP-RT-qPCR	FTO regulates the chemo-radiotherapy resistance of cervical squamous cell carcinoma (CSCC) by targeting β-catenin through mRNA demethylation	29315835	Yes
m6A	N6-methyladenosine	Cervical cancer	FTO is frequently overexpressed in human cervical cancer tissues and highly correlated with cervical cancer progression. Mechanistically, FTO directly interacts with E2F1 and Myc mRNAs and the inhibition FTO dramatically impaired the translation of these two important oncogenes, thus suppresses cervical cancer cells’ proliferation and migration.	FTO	oncogene	cell proliferation, migration	mRNA	MYC, E2F1	X	m6A dot blot assay	The m (6) a eraser FTO facilitates proliferation and migration of human cervical cancer cells.	31827395	Yes
m6A	N6-methyladenosine	Hepatocellular carcinoma	m6A methylation level decreases the expression of tumor suppressor genes like SOCS2. The upregulation of METTL3 in HCC mediates this event through an m6A-YTHDF2-dependent mechanism and increases cancer cells proliferation, migration and metastasis formation	METTL3	oncogene	cell proliferation, migration, metastasis	mRNA	SOCS2	MeRIP-seq	MeRIP-qPCR	RNA N6-Methyladenosine Methyltransferase-Like 3 Promotes Liver Cancer Progression Through YTHDF2- Dependent Posttranscriptional Silencing of SOCS2 ; Expression profiles and prognostic significance of RNA N6-methyladenosine-related genes in patients with hepatocellular carcinoma: evidence from independent datasets	29171881;31118805	Yes
m6A	N6-methyladenosine	Hepatocellular carcinoma	Snail, a key transcription factor of EMT, has an increased m6A methylation in its CDS and 3′UTR regions, through METTL3. m6A in CDS of Snail can trigger its translation elongation via interaction with YTHDF1 and eEF-2.	METTL3	oncogene	cell migration, invasion, EMT	mRNA	Snail	MeRIP-seq	MeRIP-qPCR, m6A dot blot assay	RNA mA methylation regulates the epithelial mesenchymal transition of cancer cells and translation of snail.	31061416	Yes
m6A	N6-methyladenosine	Hepatocellular carcinoma	m6A methylation level decreases the expression of tumor suppressor genes like SOCS2. The upregulation of METTL3 in HCC mediates this event through an m6A-YTHDF2-dependent mechanism and increases cancer cells proliferation, migration and metastasis formation	YTHDF2	oncogene	cell proliferation, migration, metastasis	mRNA	SOCS2	MeRIP-seq	MeRIP-qPCR	RNA N6-Methyladenosine Methyltransferase-Like 3 Promotes Liver Cancer Progression Through YTHDF2- Dependent Posttranscriptional Silencing of SOCS2	29171881	Yes
m6A	N6-methyladenosine	Hepatocellular carcinoma	HCC exhibited a characteristic gain of m6A modification in tandem with an increase of mRNA expression, owing to YTHDF2 reduction. YTHDF2 deficiency leads to mRNA stabilization of IL-11 and Serpin E2, the key mediators in support of hypoxia-induced cancer cell survival and vascular reconstruction. YTHDF2 is inhibited by HIF- 2α	YTHDF2	tumor-suppressor	inflammation, vascular reconstruction and metastatic progression	mRNA	IL-11 and SERPINE2	MeRIP-seq	LC-MS/MS, MeRIP-qPCR	YTHDF2 reduction fuels inflammation and vascular abnormalization in hepatocellular carcinoma.	31735169	Yes
m6A	N6-methyladenosine	Hepatocellular carcinoma	YTHDF2 is down-regulated by hypoxia in HCC cells, and YTHDF2 may function as a tumor suppressor in HCC by negatively modulating the EGFR mRNA stability via its binding the m6A site in the EGFR 3’UTR of mRNA, which in turn impairs the MEK/ERK pathway and consequently impedes the cell proliferation and growth	YTHDF2	tumor-suppressor	cell proliferation, cell growth	mRNA	EGFR	X	X	YTHDF2 suppresses cell proliferation and growth via destabilizing the EGFR mRNA in hepatocellular carcinoma.	30423408	No
m6A	N6-methyladenosine	Hepatocellular carcinoma	Increased m6A methylation (by KIAA1429) of ID2 mRNA reduces ID2 expression and promotes cell migration and invasion in HCC	KIAA1429	oncogene	cell proliferation, migration, invasion	mRNA	ID2	X	MeRIP-PCR	KIAA1429 regulates the migration and invasion of hepatocellular carcinoma by altering m6A modification of ID2 mRNA	31118692	Yes
m6A	N6-methyladenosine	Hepatocellular carcinoma	KIAA1429 is upregulated in HCC. KIAA1429 induces m6A methylation on the 3′ UTR of GATA3 pre-mRNA, leading to the separation of the RNA-binding protein HuR and the degradation of GATA3 pre-mRNA, leading to altered GATA3 expression and thereby facilitating the malignant phenotypes of hepatoma cells.	KIAA1429	oncogene	cell proliferation, metastasis	pre-mRNA	GATA3	MeRIP-seq	X	KIAA1429 contributes to liver cancer progression through N6-methyladenosine-dependent post-transcriptional modification of GATA3.	31856849	Yes
m6A	N6-methyladenosine	Hepatocellular carcinoma	WTAP is significantly up-regulated in HCC and promotes liver cancer development. WTAP-guided m6A modification contributes to the progression of HCC via the HuR-ETS1-p21/p27 axis. ETS proto-oncogene 1 (ETS1) was identified as the downstream effector of WTAP. The m6A modification regulated by WTAP led to post-transcriptional suppression of ETS1, with the implication of Hu-Antigen R (HuR) as an RNA …	WTAP	oncogene	cell growth, cell proliferation	mRNA	ETS1	X	m6A dot blot assay, MeRIP-qPCR	WTAP facilitates progression of hepatocellular carcinoma via m6A-HuRdependent epigenetic silencing of ETS1	31438961	Yes
m6A	N6-methyladenosine	Colorectal cancer	It was found that the negative expression of METTL3 is associated with larger tumor size and higher metastasis rates in CRC. Decreased level of METTL3 increases P38/ERK pathway expression. The increased expression of p-P38 and p-ERK is associated with CRC cells proliferation, migration and invasion.	METTL3	tumor-suppressor	cell proliferation, migration, invasion	mRNA	P38/ERK pathway	X	X	m6A methyltransferase METTL3 suppresses colorectal cancer proliferation and migration through p38/ERK pathways	31239708	No
m6A	N6-methyladenosine	Colorectal cancer	The increased m6A methylation level in SOX2 transcripts increases SOX2 expression and promotes CRC cells stemness and metastasis. METTL3 is highly expressed in CRC patients, and it induces an increased m6A methylation level in SOX2 transcripts. Methylated SOX2 mRNAs are subsequently recognized by the m6A “reader”, IGF2BP2, which maintains the mRNA stability and expression. Finally, the increased …	METTL3	oncogene	cell self-renewal, migration, metastasis	mRNA	SOX2	MeRIP-seq	MeRIP-qPCR	METTL3 facilitates tumor progression via an m6A-IGF2BP2-dependent mechanism in colorectal carcinoma	31230592	Yes
m6A	N6-methyladenosine	Colorectal cancer	The overexpressed YTHDF1, associated to DNA copy number gain, recognizes and promotes the translation of m6A-modified FZD9 and Wnt6 mRNAs, leading to an aberrant activation of Wnt/b-catenin signaling and ultimately affecting the tumorigenicity and stem cell-like activity in CRC. Epigenetic regulation by YTHDF1 plays an important role in cancer progression processes in CRC. In another study, it wa…	YTHDF1	oncogene	cell-cycle progression, cells proliferation, chemoresistence,	mRNA	Wnt/b-catenin pathway	X	X	Oncogene c-Myc promotes epitranscriptome m6A reader YTHDF1 expression in colorectal cancer; YTHDF1 Regulates Tumorigenicity and Cancer Stem Cell-Like Activity in Human Colorectal Carcinoma	29484125;31131257	No
m6A	N6-methyladenosine	Colorectal cancer	YTHDC2 is upregulated in colorectal cancer and it contributes to colon tumor metastasis by promoting translation of HIF-1α	YTHDC2	oncogene	metastasis	mRNA	HIF-1α	X	X	RNA helicase YTHDC2 promotes cancer metastasis via the enhancement of the eﬃciency by which HIF-1α mRNA is translated	26996300	No
m6A	N6-methyladenosine	Gastric cancer	Increased m6A methylation level was found to be correlated with the upregulation of METTL3 in GC patients. The increased methylation influences cell proliferation, migration and invasion by regulting transcription factors like GFI-1, apoptotic-related protein expression, AKT signaling pathway (p-AKT, p70S6K and Cyclin D1).	METTL3	oncogene	cell proliferation, invasion, migration	mRNA	AKT pathway , α‐smooth muscle actin (α‐SMA), GFI-1	X	X	METTL3 promotes the proliferation and mobility of gastric cancer cells; Dysregulated N6‐methyladenosine methylation writer METTL3 contributes to the proliferation and migration of gastric cancer	30886897;31232471	No
m6A	N6-methyladenosine	Gastric cancer	YTHDF2 overexpression in GC cells. Knockdown of YTHDF2 in MGC-803 cells inhibits cell proliferation and promotes apoptosis.	YTHDF2	oncogene	cell proliferation	mRNA	unknown	X	X	Knockdown of YTH N6-methyladenosine RNA binding protein 2 (YTHDF2) inhibits proliferation and promotes apoptosis in MGC-803 gastric cancer cells	29382422	No
m6A	N6-methyladenosine	Gastric cancer	Decreased m6A methylation level, by METTL14 downregulation or FTO upregulation, promotes the activation of oncogenic signaling pathways, such as Wnt and PI3K‐Akt and supports GC cell proliferation, migration and invasion.	METTL14	tumor-suppressor	cell proliferation, migration, invasion	mRNA	Wnt and PI3K‐Akt pathways and E-chaderin	X	X	Reduced m6A modification predicts malignant phenotypes and augmented Wnt/PI3K‐Akt signaling in gastric cancer	31243897	No
m6A	N6-methyladenosine	Gastric cancer	Decreased m6A methylation level, by METTL14 downregulation or FTO upregulation, promotes the activation of oncogenic signaling pathways, such as Wnt and PI3K‐Akt and supports GC cell proliferation, migration and invasion.	FTO	oncogene	cell proliferation, migration, invasion	mRNA	Wnt and PI3K‐Akt pathways and E-chaderin	X	X	Reduced m6A modification predicts malignant phenotypes and augmented Wnt/PI3K‐Akt signaling in gastric cancer	31243897	No
m6A	N6-methyladenosine	Endometrial cancer	~70% of tumor samples from endometrial cancer patients exhibited decreased m6A levels due to either decreased expression of METTL3 or loss of function mutation in METTL14 (R298P). This generates a reduction in m6A mRNA methylation levels and an enhancement in proliferation and tumorigenicity. Reductions in m6A methylation lead to decreased expression of the negative AKT regulator PHLPP2 and incre…	METTL14	tumor-suppressor	cell proliferation, tumorigenicity	mRNA	Akt signaling	MeRIP-seq	MeRIP-RT-qPCR, LC-MS/MS	m6A mRNA methylation regulates AKT activity to promote the proliferation and tumorigenicity of endometrial cancer	30154548	Yes
m6A	N6-methyladenosine	Endometrial cancer	~70% of tumor samples from endometrial cancer patients exhibited decreased m6A levels due to either decreased expression of METTL3 or loss of function mutation in METTL14 (R298P). This generates a reduction in m6A mRNA methylation levels and an enhancement in proliferation and tumorigenicity. Reductions in m6A methylation lead to decreased expression of the negative AKT regulator PHLPP2 and incre…	METTL3	tumor-suppressor	cell proliferation, tumorigenicity	mRNA	Akt signaling	MeRIP-seq	MeRIP-RT-qPCR, LC-MS/MS	m6A mRNA methylation regulates AKT activity to promote the proliferation and tumorigenicity of endometrial cancer	30154548	Yes
m6A	N6-methyladenosine	Melanoma	The increased m6A methylation level, in melanoma-promoting genes, PD-1 (PDCD1), CXCR4, and SOX10, promotes melanoma cells proliferation, migration and invasion in vitro and melanoma tumor growth in vivo. FTO is upregulated in melanoma, suggesting a protumorigenic role. FTO higher expression is induced by metabolic stress and starvation. It was found that PD-1 (PDCD1), CXCR4, and SOX10 are regulat…	FTO	oncogene	cell proliferation, migration, invasion and immunotherapy resistence	mRNA	PD-1 (PDCD1), CXCR4, and SOX10	MeRIP-seq	m6A dot blot assay, MeRIP-qPCR	m6A mRNA demethylase FTO regulates melanoma tumorigenicity and response to anti-PD-1 blockade	31239444	Yes
m6A	N6-methyladenosine	Melanoma	Increased m6A methylation level (due to METTL3 upregulation) promotes melanoma cell lines colony formation and invasion. MMP2 and N-cadherin play a crucial role in invasion and metastasis of melanoma cells and their expression was found to be associated to METTL3 upregulation. These results indicate that METTL3 may regulate MMP2 and N-cadherin. Whereas MMP2 expression depends on the catalytic act…	METTL3	oncogene	colony formation, invasion	mRNA	MMP2,N-cadherin	X	m6A dot blot assay	RNA m6A methyltransferase METTL3 regulates invasiveness of melanoma cells by matrix metallopeptidase 2	30762711	Yes
m6A	N6-methyladenosine	Melanoma	Decreased m6A levels are identified in ocular melanoma samples, indicating poor prognosis, and changes in global m6A modification are highly associated with tumor progression. Mechanistically, YTHDF1 promotes the translation of methylated mRNA of HINT2, a tumor suppressor in ocular melanoma.	YTHDF1	tumor-suppressor	cell growth, migration	mRNA	HINT2	miCLIP-seq, MeRIP-seq	MeRIP-qPCR	m6A modification suppresses ocular melanoma through modulating HINT2 mRNA translation	31722709	Yes
m6A	N6-methyladenosine	Osteosarcoma	Expression level of METTL3 are up-regulated in human OS tissues and OS cell lines. METTL3 promotes osteosarcoma cell progression by regulating the m6A level of LEF1 and activating Wnt/b-catenin signaling pathway.	METTL3	oncogene	cell proliferation, migration,invasion	mRNA	LEF1	X	MeRIP-qPCR	The m6A methyltransferase METTL3 promotes osteosarcoma progression by regulating the m6A level of LEF1	31253399	Yes
m6A	N6-methyladenosine	Prostate cancer	METTL3 is overexpressed in prostate cancer cell lines, together with increased m6A content. SHH-GLI signaling positively correlates with the severity of PC and METTL3 regulates the expression level of GLI1	METTL3	oncogene	cell proliferation, survival, colony formation, and invasion	mRNA	SHH-GLI1 signaling	X	m6A quantification, MeRIP-qPCR	RNA m (6) a methyltransferase METTL3 promotes the growth of prostate Cancer by regulating hedgehog pathway	31806999	Yes
m6A	N6-methyladenosine	Bladder cancer	METTL3 is upregulated in bladder cancer and m6A level is thus increased. AF4/FMR2 family member 4 (AFF4), two key regulators of NF-κB pathway (IKBKB and RELA) and MYC were further identified as direct targets of METTL3-mediated m6A modification	METTL3	oncogene	cell proliferation, invasion, tumorigenicity and survival	mRNA	AFF4/NF-κB/MYC signaling axis	MeRIP-seq	LC-MS/MS	The m (6) a methyltransferase METTL3 promotes bladder cancer progression via AFF4/NF-kappaB/MYC signaling network	30659266	Yes
m6A	N6-methyladenosine	Bladder cancer	METTL3 and CDCP1 are upregulated in bladder cancer patient samples. The increased m6A modification and translation of oncogene CDCP1 in the transformed uroepithelial cells indicates the potential role of METTL3/m6A/CDCP1 axis in bladder cancer oncogenesis.	METTL3	oncogene	cell proliferation, migration, invasion	mRNA	CDCP1	MeRIP-seq	X	Dynamic mA mRNA methylation reveals the role of METTL3-mA6-CDCP1 signaling axis in chemical carcinogenesis	30796352	Yes
m6A	N6-methyladenosine	Bladder cancer	m6A modification and METTL14 are lowly expressed in bladder cancer. METTL14 and m6A modification participate in the RNA stability of Notch1 mRNA. Notch1 m6A modification inhibits its RNA stability. Notch1 plays an essential role in bladder tumorigenesis and bladder tumor initiating cells self-renewal	METTL14	tumor-supressor	cell proliferation, self-renewal, metastasis	mRNA	Notch1	X	m6A dot blot assay	Mettl14 inhibits bladder TIC self-renewal and bladder tumorigenesis through N (6)-methyladenosine of Notch1	31760940	Yes
m6A	N6-methyladenosine	Breast cancer	m6A upregulates the levels of HBXIP; increases malignant cell growth and proliferation. METTL3 promotes the expression of HBXIP through m6A modification; an higher expression of METTL3 is related to increased levels of HBXIP in clinical breast cancer tissues and breast cancer cells; METTL3 inscreases the HBXIP expression levels by affecting m6A modification levels on HBXIP mRNA. METTL3 has an inc…	METTL3	oncogene	cell proliferation	mRNA	HBXIP	X	MeRIP qRT-PCR; m6A dot blot assay	HBXIP-elevated methyltransferase METTL3 promotes the progression of breast cancer via inhibiting tumor suppressor let-7g	29174803	Yes
m6A	N6-methyladenosine	Breast cancer	m6A levels are decreased in immortalized and oncogenically transformed human mammary epithelial cells. The levels of METTL3 are descresed and ALKBH5 are increased. Overexpression of METTL3 and METTL14 and knockdown of ALKBH5 results in increased proliferation and migaration of immortalized cells. m6A levels may be downregulated in immortalized cells. Hypoxia increased m6A levels through mechanism…	METTL3/METTL14/ALKBH5	unknown	cell proliferation and migration	mRNA	Glut1, Jun, VHL, Dusp1	X	MeRIP-PCR	N6-methyladenosine contributes to cellular phenotype in a genetically-defined model of breast cancer progression	30131850	Yes
m6A	N6-methyladenosine	Breast cancer	m6A modification control the mRNA expression level of NANOG in some breast cancer cell lines. ALKBH5 plays critical role in mediating NANOG expression and BCSC specification and/or maintenance within the hypoxic microenvironment of human breast cancer orthotopic tumors. It mediates (together with Hypoxia-inducible factors (HIFs)) m6A demetylation of NANOG in hypoxic conditions.	ALKBH5	oncogene	unknown	mRNA	NANOG	X	m6A quantification	Hypoxia induces the breast cancer stem cell phenotype by HIF-dependent and ALKBH5-mediated m6A-demethylation of NANOG mRNA	27001847	Yes
m6A	N6-methyladenosine	Breast cancer	m6A inhibits breast cancer (BC) cell viability, the ability of MDA-MB-231 cells to form colonies and suppresses cell migratory abilities resulting in an overall effect of inhibition of BC growth and metastasis. Reduced expression of m6A is associated with poor prognosis in patient. Functionally, reduced m6A levels by METTL14 overexpression and/or ALKBH5 knockdown, could inhibit breast cell viabil…	METTL14	tumor-suppressor	unknown	mRNA	unknown	X	ELISA	Changes of N6-methyladenosine modulators promote breast cancer progression.	30953473	Yes
m6A	N6-methyladenosine	Breast cancer	m6A inhibits breast cancer (BC) cell viability, the ability of MDA-MB-231 cells to form colonies and suppresses cell migratory abilities resulting in an overall effect of inhibition of BC growth and metastasis. Reduced expression of m6A is associated with poor prognosis in patient. Functionally, reduced m6A levels by METTL14 overexpression and/or ALKBH5 knockdown, could inhibit breast cell viabil…	ALKBH5	oncogene	unknown	mRNA	unknown	X	ELISA	Changes of N6-methyladenosine modulators promote breast cancer progression.	30953473	Yes
m6A	N6-methyladenosine	Breast cancer	m6A demethylation in the 3' UTR of BNIP3 mRNA leads to its degradation.	FTO	oncogene	cell growth, proliferation; evasion of apoptosis	mRNA	BNIP3	MeRIP-seq	m6A dot blot assay	RNA N6-methyladenosine demethylase FTO promotes breast tumor progression through inhibiting BNIP3	30922314	Yes
m6A	N6-methyladenosine	Breast cancer	m6A level are increased in the breast cancer tissue as compared to normal samples; METTL3 is overexpressed and promotes translation (overexpression) of Bcl-2	METTL3	oncogene	cell proliferation and apoptosis	mRNA	Bcl-2	X	m6A quantification	N6-methyladenosine METTL3 promotes the breast cancer progression via targeting Bcl-2.	31454538	Yes
m6A	N6-methyladenosine	Leukemias	METTL3 is overexpressed in AML; Depletion of METTL3 induces cell differentiation and apoptosis and delays leukemia progression; m6A promotes translation of c-MYC, BCL2, PTEN mRNAs in AML. m6A depletion may activate the PI3K/AKT pathway.	METTL3	oncogene	apoptosis and progression	mRNA	c-MYC, BCL2 and PTEN (acute myeloid leukemia)	miCLIP	TLC (thin layer chromatography); MeRIP-qPCR	The N6-methyladenosine (m6A)-forming enzyme METTL3 controls myeloid differentiation of normal hematopoietic and leukemia cells	28920958	Yes
m6A	N6-methyladenosine	Leukemias	FTO highly expressed in AML t(11q23)/MLL rearrangements, t(15;17)/PML-RARA, FLT3-ITD and/or NPM1 mutations. FTO enhances leukemic oncogene-mediated cell transformation and leukemogenesis, and inhibits all-trans-retinoic acid (ATRA)-induced AML cell differentiation, through the regulation of the target genes expression, such as ASB2 and RARA by reducing m6A levels in these mRNA transcripts.	FTO	oncogene	cell viability, proliferation, growth, inhibition of apoptosis	mRNA	ASB2 and RARA	MeRIP-seq	m6A quantification, Gene-Specific m6A qPCR	FTO Plays an Oncogenic Role in Acute Myeloid Leukemia as a N6-Methyladenosine RNA Demethylase	28017614	Yes
m6A	N6-methyladenosine	Leukemias	FTO promotes AML progression	FTO	oncogene	cell proliferation	mRNA	MYC, CEBPA, RARA, and ASB2	MeRIP-seq	m6A dot blot assay; LC-MS/MS	Small-Molecule Targeting of Oncogenic FTO Demethylase in Acute Myeloid Leukemia.	30991027	Yes
m6A	N6-methyladenosine	Leukemias	YTHDF2 specifically expands human HSC numbers without skewing lineage fate. Essential role of YTHDF2 in regulating HSC self-renewal by coupling the post-transcriptional m6A modification to the degradation of mRNAs encoding key transcription factors for self renewal (Tal1)	YTHDF2	oncogene	cell self-renewal	mRNA	Tal1	MeRIP-seq	m6A quantification	Suppression of m (6) a reader Ythdf2 promotes hematopoietic stem cell expansion	30065315	Yes
m6A	N6-methyladenosine	Leukemias	METTL14 is highly expressed in normal hematopoietic stem/progenitor cells (HSPCs) and acute myeloid leukemia (AML) cells carrying t(11q23), t(15;17), or t(8;21), and is down-regulated during myeloid differentiation. Mechanistically, METTL14 exerts its oncogenic role by regulating its mRNA targets (e.g., MYB and MYC) through m6A modification, which in turn leads to enhanced self-renewal/proliferat…	METTL14	oncogene	cell self-renewal, proliferation	mRNA	MYB, MYC	MeRIP-seq	LC-MS/MS	METTL14 inhibits hematopoietic stem/progenitor differentiation and promotes Leukemogenesis via mRNA m (6) a modification	29290617	Yes

## Sheet: m6A non-cancer disease
Short nomenclature	Full name	Disease	Effects	Enzyme	Role of the enzyme	Hallmark of cancer	RNA subtype	Modified Transcript	m6A mapping technology	m6A quantification techniques	Title	PMID	Direct modification association
m6A	N6-methyladenosine	Alzheimer	FTO regulates the phosphorylation of Tau in a mTOR-dependent manner by targeting and reducing the mRNA level of TSC1.	FTO	X	X	mRNA	TSC1	X	X	FTO is involved in Alzheimer's disease by targeting TSC1-mTOR-Tau signaling	29501742	No
m6A	N6-methyladenosine	Alzheimer	The expression of the m6A methyltransferase METTL3 is elevated and that of the m6A demethylase FTO is decreased in AD mice. m6A methylation is elevated in the cortex and the hippocampus of APP/PS1 transgenic mice.	METTL3	X	X	mRNA	X	X	m6A quantification	Abnormality of m6A mRNA Methylation Is Involved in Alzheimer’s Disease	32184705	Yes
m6A	N6-methyladenosine	Alzheimer	Decreased METTL3 mRNA expression in the postmortem hippocampal tissues of AD patients, and alteration in METTL3 protein expression, including enhanced insolubility and immunoreactivity in the AD hippocampus.	METTL4	X	X	mRNA	X	X	X	Altered Expression of the m6A Methyltransferase METTL3 in Alzheimer’s Disease	32847866	No
m6A	N6-methyladenosine	Parkinson	The overexpression of FTO reduces m6A levels and increases NMDAR1 expression levels, which could elevate oxidative stress and Ca2+. High expression of NMDAR1 will damage neurons and cause subsequent apoptotic death	FTO	X	X	mRNA	NMDAR1	X	m6A dot blot assay	Down-regulation of m6A mRNA methylation is involved in dopaminergic neuronal death	30835997	Yes
m6A	N6-methyladenosine	Type 2 Diabete	METTL3 and METTL14 protein levels are decreased in whole islets from T2D patients. The Insulin/IGF1 -AKT-PDX1 pathway is significantly affected by hypomethylation in T2D	METTL3/METTL14	X	X	mRNA	Insulin/IGF1 -AKT-PDX1 pathway	MeRIP-seq	LC-MS/MS	m6A mRNA Methylation Regulates Human β-Cell Biology in Physiological States and in Type 2 Diabetes	31867565	Yes
m6A	N6-methyladenosine	Osteoporosis	Decreased m6A level in bone marrow mesenchymal stem cells (MSCs) induces pathological features of osteoporosis in mice (impaired bone formation, incompetent osteogenic differentiation potential and increased marrow adiposity). PTH (parathyroid hormone)/Pth1r (parathyroid hormone receptor-1) signaling axis is a an important downstream pathway for m6A regulation in MSCs. METTL3 loss of function red…	METTL3	X	X	mRNA	Pth1r	MeRIP-seq	qRT-PCR	Mettl3-mediated m6A RNA methylation regulates the fate of bone marrow mesenchymal stem cells and osteoporosis	30429466	Yes
m6A	N6-methyladenosine	Ischemic Heart disease	METTL3 is upregulated in H/R-induced cardiomyocytes injury. It methylates TFEB at two m6A residues in the 3ʹ-UTR, and promotes the association of the RNA-binding protein HNRNPD with TFEB pre-mRNA and subsequently decreases the expression levels of TFEB. This inhibits the autophagic flux and increases apoptosis in H/R-treated cardiomyocytes.	METTL3	X	X	mRNA	TFEB	X	m6A dot blot assay, Me-RIP-RT-qPCR	METTL3 and ALKBH5 oppositely regulate m6A modification of TFEB mRNA, which dictates the fate of hypoxia/reoxygenation-treated cardiomyocytes	30870073	Yes
m6A	N6-methyladenosine	Major depressive disorder (MDD)	circSTAG1 is decreased in the chronic unpredictable stress–treated mouse hippocampus and in peripheral blood of patients with MDD. Overexpressed circSTAG1 captured ALKBH5 and decreased the translocation of ALKBH5 into the nucleus, leading to increased m6A methylation of fatty acid amide hydrolase (FAAH) messenger RNA and degradation of FAAH in astrocytes with subsequent attenuation of depressive-…	ALKBH5	X	X	mRNA	FAAH	X	m6A quantification	N6-Methyladenosine Modification of Fatty Acid Amide Hydrolase Messenger RNA in Circular RNA STAG1–Regulated Astrocyte Dysfunction and Depressive-like Behaviors	32387133	Yes
m6A	N6-methyladenosine	Intellectual disability (impaired learning and memory )	Loss of function mutation in FTO gene leads to postnatal growth retardation and a significant reduction in adipose tissue and lean body mass	FTO	X	X	mRNA	BDNF pathway	X	X	Inactivation of the Fto gene protects from obesity;Fat mass and obesity-associated (FTO) protein regulates adult neurogenesis	19234441;28398475	No
m6A	N6-methyladenosine	Brain arteriovenous malformations (AVMs)	WTAP is downregulated in brain AVM lesions compared with normal cerebral vessels. DSP is stabilized via WTAP-m6A-IGF2BPs- dependent manner and participated in the regulation of angiogenesis.	WTAP	X	X	mRNA	DSP	MeRIP-seq	qRT-PCR	Wilms' tumour 1-associating protein inhibits endothelial cell angiogenesis by m6A-dependent epigenetic silencing of desmoplakin in brain arteriovenous malformation	32281240	Yes

## Sheet: Ψ
Short nomenclature	Full name	Disease	Effects	Enzyme	Role of the enzyme	Hallmark of cancer	RNA subtype	Modified Transcript	Mapping technology	Quantification techniques	Title	PMID	Direct modification association
Ψ	pseudouridine	Intellectual disability	Variants in PUS7 cause the loss of function on pseudouridylation of mRNAs and tRNAs that leads to intellectual disabilities.	PUS7	X	X	tRNA and mRNA	tRNA-Glu	Ψ-seq	primer extention	Variants in PUS7 Cause Intellectual Disability with Speech Delay, Microcephaly, Short Stature, and Aggressive Behavior	30526862	Yes

## Sheet: m6Am
Short nomenclature	Full name	Disease	Effects	Enzyme	Role of the enzyme	Hallmark of cancer	RNA subtype	Modified Transcript	m6A mapping technology	m6A quantification techniques	Title	PMID	Direct modification association
m6Am	N6, 2′-O-dimethyladenosine	Bladder cancer	Larger tumors with PCIF1 knockdown	PCIF1/CAPAM	tumor growth suppressor	Cell proliferation	X	X	X	qPCR	Patient Mutation Directed shRNA Screen Uncovers Novel Bladder Tumor Growth Suppressors	26078295	No
m6Am	N6, 2′-O-dimethyladenosine	Colorectal cancer	Enhanced tumorigenesis and chemoresistance with increased m6Am mRNA levels	PCIF1/CAPAM	tumor growth suppressor	Metastasis, resistance to chemotherapy	mRNA	X	RNA-seq	LC-MS/MS, qPCR	FTO-mediated cytoplasmic m6 1 Am demethylation 2 adjusts stem-like properties in colorectal cancer cell	doi: https://doi.org/10.1101/2020.01.09.899724	Yes

## Sheet: m1A
Short nomenclature	Full name	Disease	Effects	Enzyme	Role of thr enzyme	Hallmark of cancer	RNA subtype	Modified Transcript	Mapping technology	Quantification techniques	Title	PMID	Direct modification association
m1A	N1-methyladenosine	Gastrointestinal cancer	In tumor samples, dysregulations and genetic alterations of putative m1A-related enzymes are observed. m1A-related enzymes regulate the ErbB and mTOR pathways.	ALKHB3	oncogene	cell proliferation	mRNA	ErbB2 and AKT1S1	X	X	m1A Regulated Genes Modulate PI3K/AKT/mTOR and ErbB Pathways in Gastrointestinal Cancer	31352195	No
m1A	N1-methyladenosine	Ovarian and breast cancer	CSF-1 expression is increased by the overexpression of ALKHB3. This results in cancer cell invasiveness without affecting cell proliferation and migration	ALKHB3	oncogene	cell invasiveness	mRNA	CSF-1	m1A-MAP, MeRIP-seq	qRT-PCR, IP-qRT-PCR	Human ALKBH3-induced m1A demethylation increases the CSF-1 mRNA stability in breast and ovarian cancer cells	30342176	Yes
m1A	N1-methyladenosine	Prostate cancer	Castrate resistant prostate cancer (CRPC) is a disease that is resistant to both hormone therapy and chemotherapy. ALKBH3 is highly expressed in prostate cancer but not in benign prostatic hyperplasia or in normal prostate epithelium and the expression levels of ALKBH3 protein are significantly correlated with the hormone-independent state of prostate cancer. ALKBH3 gene silencing markedly induce…	ALKHB3	oncogene	cell growth, tumorigenicity	X	PI3K-Akt pathway	X	X	anti-tumor effect of AlkB homolog 3 knockdown in hormone- independent prostate cancer cells	22515525	No
m1A	N1-methyladenosine	Non-small cell lung cancer	ALKBH3 is overexpressed in lung adenocarcinoma cells. Knockdown of ALKBH3 by siRNA transfection induced expression of p21WAF1/Cip1 and p27Kip1 in the human lung adenocarcinoma cell line A549, resulting in cell cycle arrest, senescence and strong suppression of cell growth in vitro. In vivo, peritoneal tumour growth and dissemination was inhibited in nude mice, previously inoculated with the A549 …	ALKHB3	oncogene	cell survival and progression	mRNA	p21,p27	X	X	ALKBH3, a human AlkB homologue, contributes to cell survival in human non-small-cell lung cancer	21285982	No
m1A	N1-methyladenosine	Pancreatic cancer	ALKBH3 protein is expressed in RCC tissues and associated with advanced pathological T-factor, TNM stage and distant metastasis in the RCC cases	ALKHB3	oncogene	cell proliferation, apoptosis and angiogenes	mRNA	VEGF	X	X	PCA-1/ALKBH3 Contributes to Pancreatic Cancer by Supporting Apoptotic Resistance and Angiogenesis	22826605	No
m1A	N1-methyladenosine	Renal cell carcinoma	PCA-1/ALKBH3 expression is positively correlated with renal cell carcinoma (RCC). Furthermore, its knockdown has a therapeutic efficacy on RCC.	ALKHB3	oncogene	cell progression, metastasis	X	X	X	X	Clinical significance and therapeutic potential of prostate cancer antigen-1/ALKBH3 in human renal cell carcinoma	26035443	No

## Sheet: m5C
Short nomenclature	Full name	Disease	Effects	Enzyme	Role of the enzyme	Hallmark of cancer	RNA subtype	Modified Transcript	Mapping technology	Quantification techniques	Title	PMID	Direct modification association
m5C	5-methylcytosine	Breast cancer	MDAMB468 breast cancer cells were examined to identify m5C epitranscriptome. Differentially methylated sites between breast cancer cells and normal control cell lines were found at CDS and 3`UTRs of mRNA. Genes related to apoptosis and programmed cell death are differentially methylated	unknown	unknown	unknown	mRNA	unknown	Bisulphite-seq	RT-PCR	Topological Characterization of Human and Mouse m5C Epitranscriptome Revealed by Bisulfite Sequencing	30009162	Yes
m5C	5-methylcytosine	Breast cancer	NSUN2 is shown to promote cell proliferation, migration, and invasion while NSUN2 knockdown inhibits these processes in vitro and in vivo. Results demonstrate that the overall expression of NSUN2 significantly correlated with clinical stage, tumor classification , pathological differentiation , as well as with the expression levels of estrogen receptor , progesterone receptor, and Ki-67 . Further…	NSUN2	oncogene	cell proliferation, migration, and invasion	X	X	X	X	Overexpression of NSUN2 by DNA hypomethylation is associated with metastatic progression in human breast cancer; Genomic gain of 5p15 leads to over-expression of Misu (NSUN2) in breast cancer	27447970; 19740597	No
m5C	5-methylcytosine	Head and neck squamous cell carcinoma (HNSCC)	Nsun2 affects the stability and nuclear-cytoplasmic shuttling of mRNAs, noncoding RNAs and tRNAs.High NSun2 expression is associated with poor suvival rates.	NSun2	oncogene	tumor metastasis and poor overall survival	mRNA	unknown	X	X	High tRNA TransferaseNSUN2Gene Expression is Associated with Poor Prognosis in Head and Neck Squamous Carcinoma	29775108	No
m5C	5-methylcytosine	Urothelial carcinoma of the bladder (UCB)	NSun2 and YBX1 stabilize the oncogene HDGF mRNA that mediates UCB pathogenesis in human	NSun2 and YBX1	oncogene	tumor progression	mRNA	HDGF	Bisulphite-seq	UHPLC–MRM–MS/MS	5-methylcytosine promotes pathogenesis of bladder cancer through stabilizing mRNAs	31358969	Yes
m5C	5-methylcytosine	Gastric cancer	NSUN2 was significantly upregulated in gastric cancers. NSUN2 acts as an oncogene through promoting gastric cancer development by repressing p57Kip2 in an m5C-dependent manner, which may provide a novel therapeutic target against gastric cancer.	NSUN2	oncogene	cell proliferation	mRNA	CDKN1C (p57Kip2)	RNA-seq	m5C dot blot assay, m5C RIP/RT-PCR	RNA methyltransferase NSUN2 promotes gastric cancer cell proliferation by repressing p57Kip2 by an m5C-dependent manner	32332707	Yes

## Sheet: 2'-O-Me
Short nomenclature	Full name	Disease	Effects	Enzyme	Role of the enzyme	Hallmark of cancer	RNA subtype	Modified Transcript	Mapping technology	Quantification techniques	Title	PMID	Direct modification association
2'-O-Me	2′-O-methylation	Leukemia	Significant chnages in pathways that regulate cell cycle, translation, PI3K/AKT signalling, epigenetic, RNA meatbolism and apoptotic processes.	CMTR1	X	cancer cell growth, cell invasion, drug resistance	X	X	X	X	Mutant JAK3 phosphoproteomic profiling predicts synergism between JAK3 inhibitors and MEK/BCL2 inhibitors for the treatment of T-cell acute lymphoblastic leukemia	28852199	No
2'-O-Me	2′-O-methylation	Lung adenocarcinoma	Significant mutation and enrichment of frame shift mutations in CMTR2.	CMTR2	X	X	X	X	X	X	Distinct patterns of somatic genome alterations in lung adenocarcinomas and squamous cell carcinomas	27158780	No
2'-O-Me	2′-O-methylation	asthma	CMTR1 is associated with an increased risk of exacerbations in asthma	CMTR1	X	X	X	X	X	X	CMTR1 is associated with increased asthma exacerbations in patients taking inhaled corticosteroids	26734457	No
